# Supplementary material for: Improved dissolution of cellulose in quaternary ammonium hydroxide by adjusting temperature
Source: Royal Society of Chemistry journal article supplement (doi:10.1039/c5ra04247j), 2015-01-01
Supplement: c5ra04247j1.pdf [file c5ra04247j1.pdf]

## Supplementary Information

### **Improved dissolution of cellulose in quaternary ammonium hydroxide by adjusting temperature**

Wei Wei<sup>1</sup>, Xiao Wei<sup>1</sup>, Guangjun Gou<sup>1</sup>, Man Jiang<sup>1</sup>, Xiaoling Xu<sup>1</sup>, Yong Wang<sup>1</sup>, David Hui<sup>2</sup>, and Zuowan Zhou<sup>\*,1</sup>

*1. Key Laboratory of Advanced Technologies of Materials (Ministry of Education), School of Materials Science and Engineering, Southwest Jiaotong University, Chengdu, Sichuan, 610031, China*

*2. Department of Mechanical Engineering, University of New Orleans, New Orleans, LA 70148, United States*

**[A] Preparation of TBAH aq. solution**

**[B] TEM images of microcrystalline cellulose**

**[C] FT-IR result**

**[D] DSC curves of 40 wt% and 60 wt% TBAH aq. solution**

**[E] TEM images and ED patterns of 40 wt% TBAH aq. solution**

**[F] Molecular model of elemental fibril of cellulose I<sub>β</sub>**

### [A] Preparation of TBAH aq. solution

The 40 wt% TBAH aq. solution (L02809) is supplied from Alfa Aesar Corporation. It is reported that cation of alkali metal, such as  $\text{Li}^+$ ,  $\text{Na}^+$  and  $\text{K}^+$ , can inhibit the dissolution of cellulose.<sup>1</sup> Hence the concentrations of alkali metals are analysed through Atomic Absorption Spectra (AAS) with a Varian SpectrAA 220FS. Lithium is below the detection limit (1.25 mg/L) of this instrument. The concentrations of Sodium and Potassium are 22.0 and 2.53 mg/L respectively, which indicates a low content of alkali metal ions in the received TBAH solution. The effect of alkali metal can be ignorable. A concentrated TBAH solution is obtained through distillation under a reduced pressure of -0.1 MPa at 45 °C. The concentration of obtained TBAH solution is proportional to the concentration of  $\text{OH}^-$  in solution, which can be confirmed by acidimetry. A desired concentration of TBAH solution is achieved by the attenuation with deionized water.

### [B] TEM images of microcrystalline cellulose

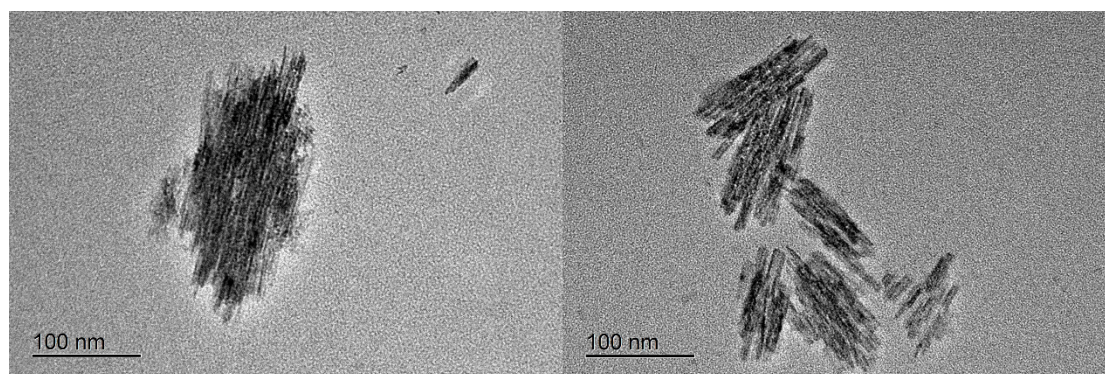

**Fig. S1** TEM images of microcrystalline cellulose used in this experiment.

### [C] FT-IR result

The Fourier transform infrared (FT-IR) spectra of cellulose before and after dissolution furtherly confirmed the evidence of dissolution of cellulose (Fig. S2). The disappeared absorptions at 3340-3375 and 3270  $\text{cm}^{-1}$  were due to the  $\text{O}(3)\text{H}\cdots\text{O}(5)$  intramolecular hydrogen bond and  $\text{O}(6)\text{H}\cdots\text{O}(3)$  intermolecular hydrogen bond of cellulose respectively,<sup>2</sup> indicating a destruction of original cellulose hydrogen-bonded networks. A peak at 2923  $\text{cm}^{-1}$  had formed, corresponding to the  $\text{C}(6)\text{H}_2$  stretching vibration. The peaks at 1430 and 1033  $\text{cm}^{-1}$  were attributed to the symmetric bending of  $\text{C}(6)\text{H}_2$  and stretching vibration of  $\text{C}(6)\text{-O}$  in MC respectively, which shifted to 1420 and 1022  $\text{cm}^{-1}$  in regenerated cellulose.<sup>3</sup> Those changes involving  $\text{C}(6)$ ,  $\text{O}(3)$ ,  $\text{O}(5)$  and  $\text{O}(6)$  in D-glucose unit of cellulose indicated the transformation of hydrogen bond network associating with  $\text{O}_6$ .<sup>4-6</sup>

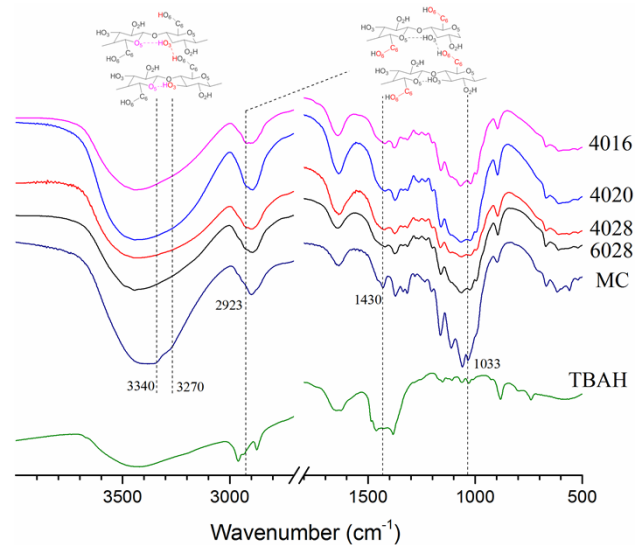

**Fig. S2** FT-IR spectra of (TBAH) freeze dried TBAH, (MC) microcrystalline cellulose, cellulose after dissolution in (6028) 60 wt% TBAH aq. solution at 28 °C, (4028) 40 wt% TBAH aq. solution at 28 °C, (4020) 40 wt% TBAH aq. solution at 20 °C and (4016) 40 wt% TBAH aq. solution at 16 °C, are recorded on a Nicolet 6700 (Thermo Scientific Inc.) with a resolution of 2  $\text{cm}^{-1}$  in the range from 4000 to 400  $\text{cm}^{-1}$  at room temperature.

**[D] DSC curves of 40 wt% and 60 wt% TBAH aq. solution**

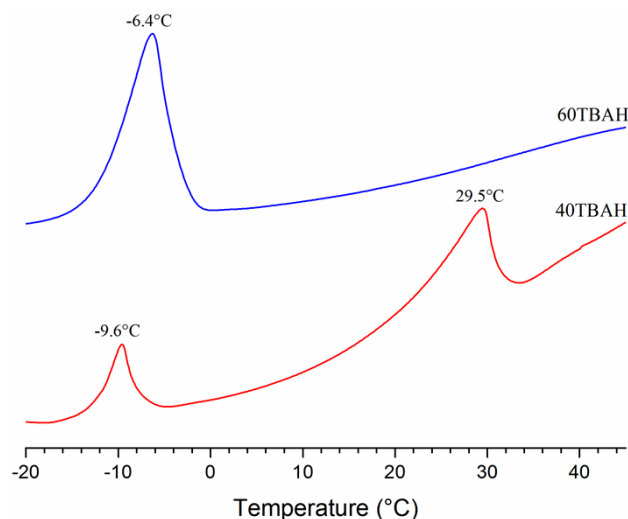

**Fig. S3** DSC curves of 40 wt% and 60 wt% TBAH aq. solution. It is recorded on a STA449C (NETZSCH Inc.) with stainless steel crucibles. Samples are pre-cooled to -30 °C and kept for 30 min and then heated to +75 °C with heating rate of 1 °C/min.

**[E] TEM images and ED patterns of 40 wt% TBAH aq. solution**

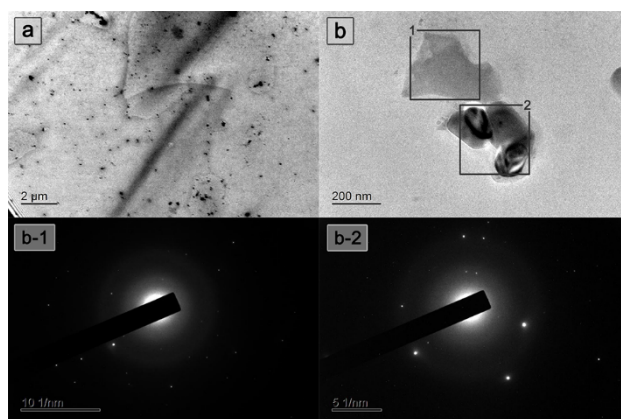

**Fig. S4** TEM images of 40 wt% TBAH aq. solution **(a)&(b)** and their ED patterns of crystals **(b-1)&(b-2)**, corresponding to the square-1 and square-2 in picture **(b)** respectively. A thin layer of 40 wt% TBAH aq. solution is suspended on a holey carbon film and dries in air at 19 °C for about 10 min.

### **[F] Molecular model of elemental fibril of cellulose I<sub>β</sub>**

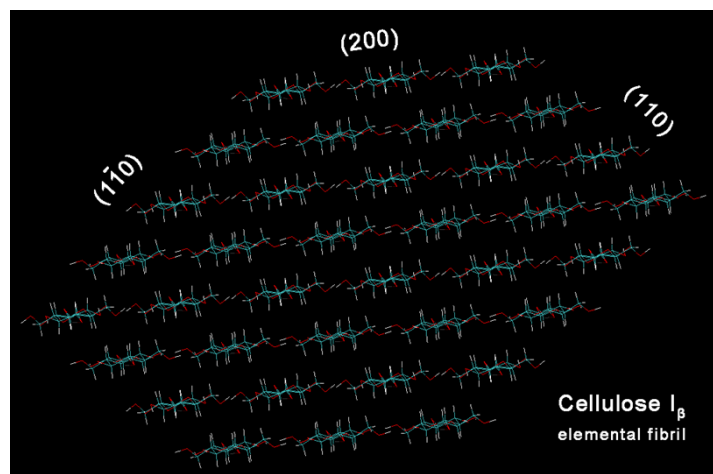

**Fig. S5** A molecular model of elemental fibril of cellulose I<sub>β</sub> proposed by Himmel.<sup>7</sup> It is built by cellulose-builder.<sup>8</sup>

### References

1. T. Ema, T. Komiyama, S. Sunami and T. Sakai, *RSC Advances*, 2014, **4**, 2523-2525.
2. T. Kondo, *Cellulose*, 1997, **4**, 281-292.
3. J. Han, C. Zhou, A. D. French, G. Han and Q. Wu, *Carbohydrate Polymers*, 2013, **94**, 773-781.
4. C. Zhong, C. Wang, F. Huang, H. Jia and P. Wei, *Carbohydr. Polym.*, 2013, **94**, 38-45.

5. H. S. Barud, R. M. N. Assunção, M. A. U. Martines, J. Dexpert-Ghys, R. F. C. Marques, Y. Messaddeq and S. J. L. Ribeiro, *J. Sol-Gel Sci. Technol.*, 2007, **46**, 363-367.
6. L. Zhang, D. Ruan and S. Gao, *J. Polym. Sci., Part B: Polym. Phys.*, 2002, **40**, 1521-1529.
7. S. Ding and M. E. Himmel, *J. Agric. Food Chem.*, 2006, **54**, 597-596.596.
8. T. C. Gomes and M. S. Skaf, *Journal of computational chemistry*, 2012, **33**, 1338-1346.
